# Supplementary material for: Effect of the Wingman-Connect Upstream Suicide Prevention Program for Air Force Personnel in Training: A Cluster Randomized Clinical Trial
Source: PubMed Central journal article supplement (PMC7578767; doi:10.1001/jamanetworkopen.2020.22532), 2020-10-21
Supplement: jamanetwopen-e2022532-s003.pdf [file jamanetwopen-e2022532-s003.pdf]

## Data Sharing Statement

Wyman. Effect of the Wingman-Connect Upstream Suicide Prevention Program for Air Force Personnel in Training. *JAMA Netw Open*. Published October 21, 2020. 10.1001/jamanetworkopen.2020.22532

### Data

**Data available:** No

### Additional Information

**Explanation for why data not available:** Data from this study are from active duty Air Force personnel. Future decisions to make data available would required authorization from the US Air Force
